# Supplementary material for: Goal Narrowing Drives Compulsive Decision Making in Patients with Methamphetamine Use Disorder: A Cross-Sectional Study of Neural and Behavioral Correlates
Source: Research Square preprint supplement (doi:10.21203/rs.3.rs-8549153/v1), 2026-01-28
Supplement: Supplementary file 1 [file 9656cb93b0495dd58536ba05.docx]

The eight models including three variants of a simple Q-learning model, two variants of an Actor-Critic model, and two variants of a Hybrid model incorporating both Q-learning and actor-critic elements to best match the pattern of choice behavior in the reinforcement learning task.

For every participant, the simple Q-learning algorithm calculates the expected reward value

(Q) for an action (a) based on their choice and feedback history. The expected values are set at zero before learning, and the expected reward value for an action *a* after trial t is,

*a* represents the learning rate ranging between 0 and 1, R(t) is the outcome value in the real and d(t) is the difference between the actual and the expected outcome,

The simple Q-learning model assumes that the subject learns the value of each action (a1 or a2) at the same learning rate. Based on the simple Q-learning model, the first modified Q-learning model has two different alphas for negative and positive Prediction errors, the second modified Q-learning model has two different alphas for negative and positive Q values. The third modified Q-learning model adjusts outcome weighted by a free parameter.

And all the probability of choosing the optional in that trial was computed using the following softmax rule,

𝑠𝑜𝑓𝑡𝑚𝑎𝑥_𝑎1=𝑒𝑥𝑝(𝛽∗𝑄𝑎1(𝑡))/{𝑒𝑥𝑝[𝛽∗𝑄𝑎1(𝑡)]+𝑒𝑥𝑝[𝛽∗𝑄𝑎2(𝑡)]}

Here, the parameter *β* represents the inverse temperature during the choice process. Lower *β* values suggest greater randomness in the choice process and lesser sensitivity to expected reward values. Higher *β* values suggest a higher propensity to choose the stimulus with larger expected rewards.

In the Actor-Critic model, every pair of stimuli is represented as a state s, and the expected value associated with that state in a given trial t is represented as Vs(t). *ac* represents the learning rate of the critic module, which determines the degree to which state values are updated according to the prediction error,

The value functions are updated using a prediction error, ε(t), as follows,

The actor module selects from among multiple actions, a, within a state, s, on a trial, t, according to their weights *w*sa(t). The weight of the selected action is adjusted using the prediction error from the critic module, ε(t), using the following rule,

where *a*a is the learning rate for the actor module, which is used to determine the degree of influence of the prediction error on the action weight. Then normalized the actor weights using the sum of their absolute values to avoid unbounded growth, and the weights were initialized at 0.01. For example, given two possible actions, a1 and a2, actor weight for a1 was normalized as follows:

Using these weights, the probability of choosing the action a1 in a trial t, was determined using the following softmax rule:

𝑠𝑜𝑓𝑡𝑚𝑎𝑥_𝑎1=𝑒𝑥𝑝(𝛽∗*ws*𝑎1(𝑡))/{𝑒𝑥𝑝[𝛽∗*ws*𝑎1(𝑡)]+𝑒𝑥𝑝[𝛽∗ *ws*𝑎2(𝑡)]}

The basic Actor-Critic model assumes that the subject learns the value of each action at the same learning rate but with the outcome weighted by free parameter*.* The modified Actor-Critic model assumes that the subject learns the value of each option separately.

The Hybrid Actor-Critic Q-learning model incorporates the expected value of each action from the Q-learning model with the action weights determined from the Actor-Critic model, using a mixing parameter, c, the value of which reflects the independent contributions of each model as per the following rule:

As c ranges from 0 to 1, the model transitions from a purely Actor-Critic model to the WeightedQ model. Action a1 is then selected in a given trial t with a probability using a softmax function:

𝑠𝑜𝑓𝑡𝑚𝑎𝑥_𝑎1=𝑒𝑥𝑝(𝛽∗*Hs*𝑎1(𝑡))/{𝑒𝑥𝑝[𝛽∗ *Hs*𝑎1(𝑡)]+𝑒𝑥𝑝[𝛽∗ *Hs*𝑎2(𝑡)]}

This model assumes that the subject learns the value of each option simultaneously, and the modified Hybrid Actor-Critic Q-learning model assumes that the subject learns the value of each option separately.

The optimization algorithm for the parametric model was the L-BFGS-B algorithm(1–3). Model selection was based on a combination of the Akaike Information Criterion (AIC) and the Bayesian Information Criterion (BIC).

where n represents the number of sample size, k denotes the number of parameters in the model, and L indicates the maximum likelihood estimation of the model. The fitted results of the simple Q-learning model were selected for subsequent analyses for its best performance (lowest AIC and BIC).

The performance (based on AIC and BIC) of the eight models was ranked (**Table1**). The simple Q-learning model demonstrated superior model fitness as evidenced by the lowest AIC and BIC.

**Table1. Parameters of different models**

| **Model** | **Formular of updating values** | **AIC** | **BIC** | **N trials** | **N**  **parameters** |
| --- | --- | --- | --- | --- | --- |
| **Simple Q-learning mode** | **Qa(t+1) = Qa(t)+α*d(t)** | 64.287 | 69.860 | 120 | 3 |
| **The first modified Q-learning model** | 69.397 | 77.757 | 120 | 3 |
| **The second modified Q-learning model** | 71.209 | 79.569 | 120 | 3 |
| **The third modified Q-learning mode** | 140.663 | 149.022 | 120 | 3 |
| **Basic Actor-Critic model** | **Vs(t+1) = Vs(t)+α*ε(t)** | 140.044 | 148.403 | 120 | 3 |
| **Modified Actor-Critic model** | 73.022 | 81.382 | 120 | 4 |
| **Hybrid Actor-Critic Q-learning mode** | **Hsa(t) = [(1-c)*wsa(t)+c*Qa(t)]** | 74.685 | 88.618 | 120 | 5 |
| **Modified Hybrid Actor-Critic Q-learning model** | 152.107 | 168.826 | 120 | 6 |

**Table2. Characteristics of participants**

| **Characteristics** | **Healthy group (N = 27)** | **Mild group (N = 27)** | **Moderate-Severe group (N = 27)** | **F/t** | **P** |
| --- | --- | --- | --- | --- | --- |
| **Age(years)** | 35.1±4.7 | 35.6±4.2 | 35.5±4.4 | 0.447 | 0.641 |
| **Education(years)** | 10.3±3.1 | 10.1±1.7 | 10.6±1.7 | 0.258 | 0.773 |
| **Age of onset use(years)** | NA | 25.1±5.0 | 24.6±5.0 | 1.043 | 0.302 |
| **Duration of usage(years)** | NA | 10.5±4.4 | 10.9±4.2 | -0.771 | 0.444 |
| **Duration from last use(days)** | NA | 128.0±27.7 | 132.1±24.8 | -1.159 | 0.252 |

Table1. Eighty-one right-handed male participants were included: a healthy group (n = 27), Mild MUD group (n = 27), and Moderate-Severe MUD group (n = 27). There was no significant demographic difference among the three groups.

1. Zhu CY, Byrd RH, Lu PH, Nocedal J. Algorithm 778: L-BFGS-B: Fortran subroutines for large-scale bound-constrained optimization. ACM Trans Math Softw. 1997 Dec;23(4):550–60.

2. Akaike H. New Look at Statistical-Model Identification. IEEE Trans Autom Control. 1974;AC19(6):716–23.

3. Schwarz G. Estimating the Dimension of a Model. The Annals of Statistics. 1978;6(2):461–4.
